# Supplementary material for: Thermal transport properties of antimonene: an ab initio study
Source: Royal Society of Chemistry journal article supplement (doi:10.1039/c6cp06088a), 2016-01-01
Supplement: c6cp06088a1.pdf [file c6cp06088a1.pdf]

Supplementary Material

**Thermal Transport Properties of Antimonene: An *ab initio* Study**

Shudong Wang<sup>a\*</sup>, Wenhua Wang<sup>a</sup>, and Guojun Zhao<sup>a</sup>

<sup>a</sup>School of Physical Science and Technology, Inner Mongolia University, Hohhot 010021,

China

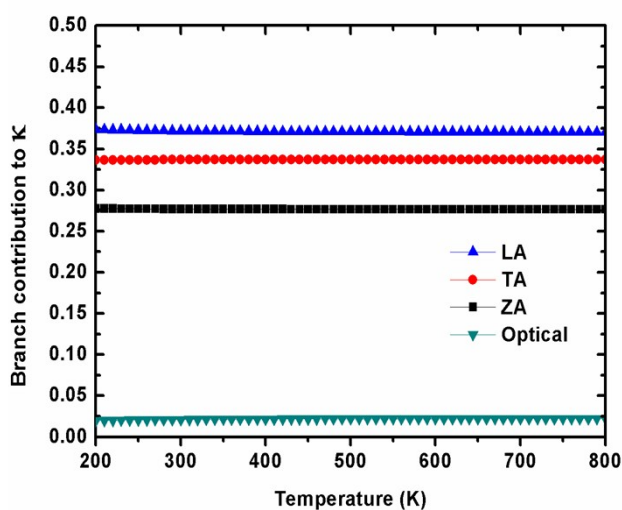

**Fig. 1.** Temperature dependence of branch contribution to lattice thermal conductivity.
